# Supplementary material
Source: publisher figshare collection journal article supplement (https://acs.figshare.com/ndownloader/files/11822597)
Supplement: Supplementary file 1 [file 11822597]

## Supporting Information

### **Few-layers PdSe<sub>2</sub> sheets: The promising thermoelectric materials driven by high valley convergence**

Minglei Sun,<sup>†,‡</sup> Jyh-Pin Chou,<sup>§</sup> Lihong Shi,<sup>⊥</sup> Junfeng Gao,<sup>‡</sup> Alice Hu,<sup>§</sup> Wencheng Tang,<sup>\*,†</sup>

Gang Zhang<sup>\*,‡</sup>

<sup>†</sup> School of Mechanical Engineering, Southeast University, 79 Suyuan Avenue, Nanjing  
211189, China

<sup>‡</sup> Institute of High Performance Computing, A<sup>\*</sup>STAR, 1 Fusionopolis Way, Singapore  
138632, Singapore

<sup>§</sup> Department of Mechanical and Biomedical Engineering, City University of Hong Kong, 83  
Tat Chee Avenue, Hong Kong 999077, China

<sup>⊥</sup> School of Science, JiangNan Uuniversity, 1800 Lihu Avenue, Wuxi 214122, China

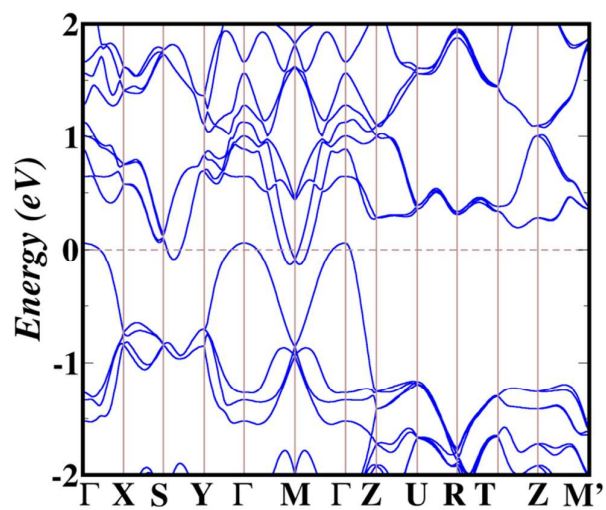

**Figure S1.** Electronic band structure of bulk PdSe<sub>2</sub> calculated by PBE-TS+SCS+SOC method. The Fermi level has been set to zero and indicated by the dashed line.

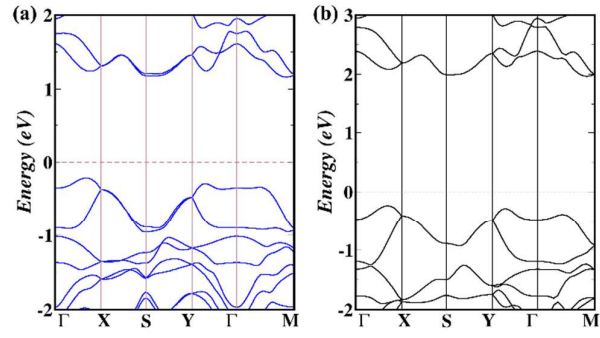

**Figure S2.** Electronic band structures of monolayer PdSe<sub>2</sub> calculated by the (a) PBE-TS+SCS+SOC and (b) PBE-TS+SCS+HSE06 methods. The Fermi level has been set to zero and indicated by the dashed line.

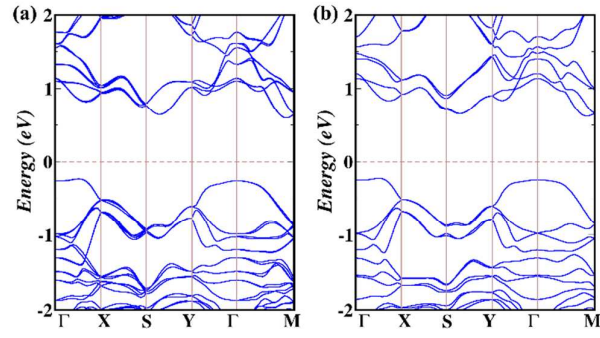

**Figure S3.** Electronic band structures of bilayer PdSe<sub>2</sub>: (a)  $\alpha$ -PdSe<sub>2</sub> and (b)  $\beta$ -PdSe<sub>2</sub> calculated by the PBE–TS+SCS+SOC method. The Fermi level has been set to zero and indicated by the dashed line.

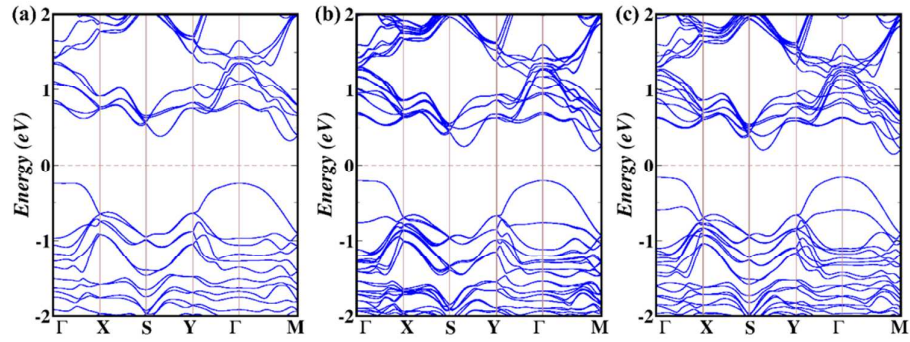

**Figure S4.** Electronic band structures of (a) trilayer, (b) tetralayer, and (c) pentalayer PdSe<sub>2</sub> calculated by the PBE-TS+SCS+SOC method. The Fermi level has been set to zero and indicated by the dashed line.

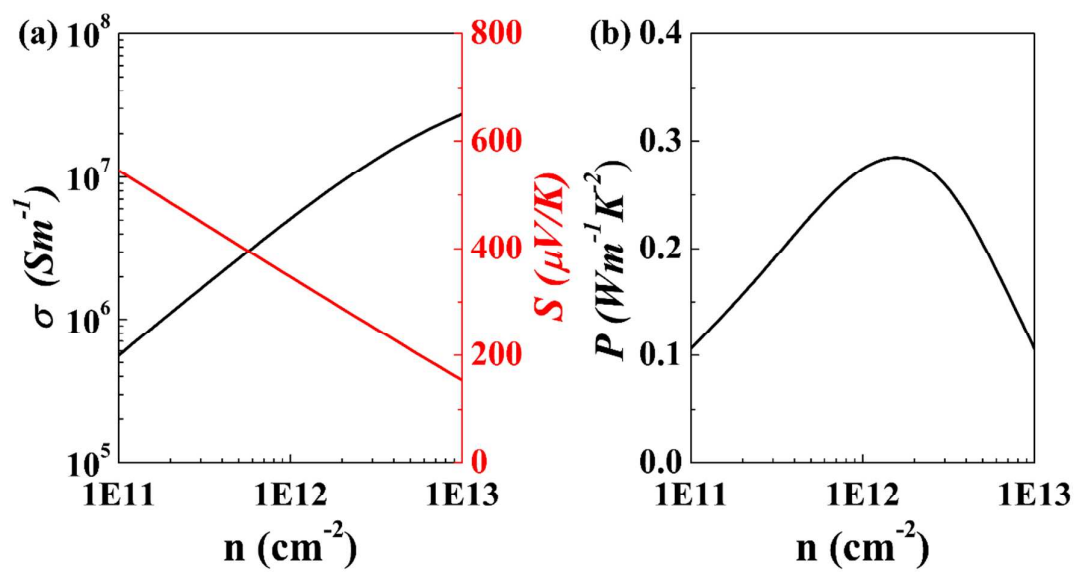

**Figure S5.** Electronic transport coefficients of monolayer PdSe<sub>2</sub> at room temperature as a function of  $n$ . (a)  $\sigma$  and  $S$ , and (b)  $P$ .

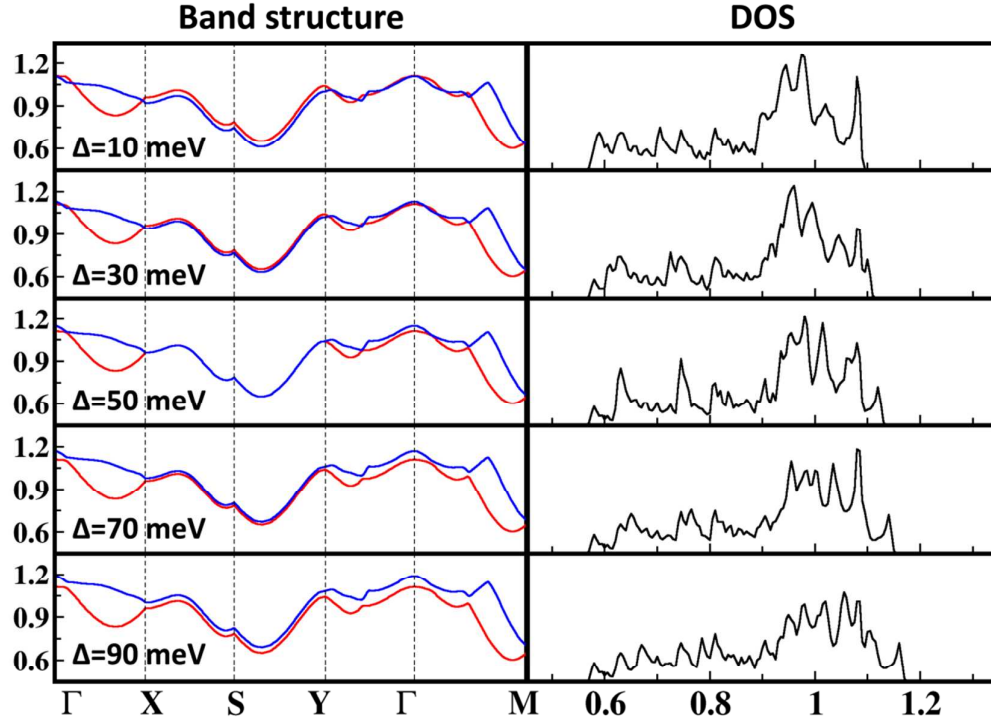

**Figure S6.** Band structures and PDOSs of the CBM and the CBM+1 states of  $\alpha$ -PdSe<sub>2</sub> bilayer with  $\Delta_{\text{CBM}}$  of 10, 30, 50, 70, and 90 meV, respectively.
